# Supplementary material for: Development of a standard set of PROs and generic PROMs for Dutch medical specialist care
Source: Springer Nature journal article supplement (doi:10.1007/s11136-022-03328-3), 2023-02-09
Supplement: MOESM1 [file 24011858]

*This document contains supplementary material to the following paper: Development of a standard set of PROs and generic PROMs for Dutch medical specialist care. A consensus-base co-creation approach by Oude Voshaar et al.*

In Supplemental Figure 1, the activities of each working session are summarized.

Supplemental Table 1 contains signaling questions that were used in phase 3 of the study “criteria assessment” during which selected PROMs were subjected to a detailed review of quality criteria. These questions were inspired by the OMERACT Filter 2.1 for instrument selection, in such a way that each PROM could receive a ‘green’, ‘amber’, or ‘red’ rating for each criterion. Supplemental Table 3 presents an overview of the results of this phase 3.

Supplemental Table 2 summarizes the results of the PRO selection step of PROM cycle step 2 PRO selection and operationalization

**Supplemental Figure 1. Activities per working session**

| Step       | Kick-off                                                                                                                                    | Objective and criteria                                                                                                                                   | Selection PROs                                                                                      | Selection PRO(M)s                                                                                                       | Selection PROMs                                                                                                                                      | Selection PROMs                                                                                                                              |                                                                                                                                                 |                                                                                                                                                                                                                                |
|------------|---------------------------------------------------------------------------------------------------------------------------------------------|----------------------------------------------------------------------------------------------------------------------------------------------------------|-----------------------------------------------------------------------------------------------------|-------------------------------------------------------------------------------------------------------------------------|------------------------------------------------------------------------------------------------------------------------------------------------------|----------------------------------------------------------------------------------------------------------------------------------------------|-------------------------------------------------------------------------------------------------------------------------------------------------|--------------------------------------------------------------------------------------------------------------------------------------------------------------------------------------------------------------------------------|
|            | Session I                                                                                                                                   | Session II                                                                                                                                               | Session III                                                                                         | Session IV                                                                                                              | Session V                                                                                                                                            | Session VI                                                                                                                                   | Comment phase                                                                                                                                   | Session VII                                                                                                                                                                                                                    |
| Activities | <ul style="list-style-type: none"> <li>Discussion of goals, scope, and working group members' perspectives on selection criteria</li> </ul> | <ul style="list-style-type: none"> <li>Agreement on selection criteria</li> <li>Agreement of key concepts</li> <li>First discussion of PRO(s)</li> </ul> | <ul style="list-style-type: none"> <li>PRO operationalization</li> <li>PROM introduction</li> </ul> | <ul style="list-style-type: none"> <li>Final selection of PROs</li> <li>Agreement on PROM selection criteria</li> </ul> | <ul style="list-style-type: none"> <li>Update on PROM quality evaluation</li> <li>Review of umbrella &amp; patient organizations feedback</li> </ul> | <ul style="list-style-type: none"> <li>Final selection of PROMs</li> <li>Discussion on recommendations for implementation and use</li> </ul> | <ul style="list-style-type: none"> <li>Webinar for stakeholders</li> <li>Submission of preliminary results to umbrella organizations</li> </ul> | <ul style="list-style-type: none"> <li>Discussion of stakeholder feedback</li> <li>Amendment of PROM selection and recommendations for use</li> <li>Approval by board of umbrella organisations on January 13, 2022</li> </ul> |

**Supplemental Table 1. PROMs signaling questions**

| Domain               | Quality criteria                                                                                                                                                                           | Green rating                                                                                                                                                               | Amber rating    | Red rating                                                                                                                                     |
|----------------------|--------------------------------------------------------------------------------------------------------------------------------------------------------------------------------------------|----------------------------------------------------------------------------------------------------------------------------------------------------------------------------|-----------------|------------------------------------------------------------------------------------------------------------------------------------------------|
| Feasibility          | Number of items                                                                                                                                                                            | < 20 items                                                                                                                                                                 | 20-25 item      | >25 items                                                                                                                                      |
|                      | Patient friendliness*                                                                                                                                                                      | CEFR Language Level <B2 AND<br>< 20 items AND<br>< 5 answer options in rating<br>scale or numeric 0-10 rating<br>scale AND<br>>= 67% 'green' ratings on<br>remaining items | Remaining cases | CEFR Language Level =C1 OR<br>> 25 items OR<br>> 5 options in rating scale OR<br><50 % 'green' ratings on<br>remaining items                   |
|                      | Costs                                                                                                                                                                                      | No                                                                                                                                                                         | Yes             | Not applicable                                                                                                                                 |
| Content validity     | Criterion 1: 85% of the items<br>are relevant to measure the<br>construct<br>Criterion 2: The set of items<br>provides a comprehensive<br>assessment of the<br>subdomains of the construct | Positive expert judgement for<br>both criteria based on<br>agreement among two raters                                                                                      | Remaining cases | Negative expert judgement<br>for one or both criteria based<br>on agreement among two<br>raters                                                |
| Construct validity** | Hypothesis about correlation<br>with other outcomes OR core<br>differences between groups<br>known to differ with respect<br>to the construct to be<br>measured                            | >= 75% of hypotheses (n >5)<br>of correlation with other<br>outcome measurements or of<br>differences scores between<br>known groups is confirmed.                         | Remaining cases | 50% of hypotheses (n >5) of<br>correlation with other<br>outcome measurements or of<br>difference scores between<br>known groups is confirmed. |
| Reliability**        | Test retest or inter-item<br>relations based reliability<br>coefficient                                                                                                                    | Lowest reliability found >0.7,<br>2 or more studies                                                                                                                        | Remaining cases | Lowest reliability found <0.7,<br>2 or more studies                                                                                            |
| Responsiveness**     | Change scores consistent with<br>hypotheses with respect to<br>change in clinical status                                                                                                   | Change scores consistent with<br>hypotheses, 2 or more studies                                                                                                             | Remaining cases | Change scores inconsistent<br>with hypotheses, 2 or more<br>studies                                                                            |

\*Assessed using the Pharos rapid test for patient questionnaires in healthcare.; Criteria adapted from the criteria for good measurement properties listed in the COSMIN manual for systematic reviews of PROMs

**Supplemental Table 2. PRO identification**

| Domain                    | Disease impact level | Initial categorization of PROs | Refined categories   | Voting results* working group members (n=14) | Voting results *patient organizations (n=8) |                      |           |          |         |
|---------------------------|----------------------|--------------------------------|----------------------|----------------------------------------------|---------------------------------------------|----------------------|-----------|----------|---------|
| Pain                      | Symptoms             | Symptoms                       | Fatigue              | 9 (64%)                                      | 7 (88%)                                     |                      |           |          |         |
| Fatigue                   |                      |                                | Sleep                | 4 (29%)                                      | 3 (38%)                                     |                      |           |          |         |
| Sleep                     |                      |                                |                      | Pain                                         | 9 (64%)                                     | 7 (88%)              |           |          |         |
| Sight                     |                      |                                |                      |                                              | Functioning                                 | Physical functioning | 14 (100%) | 8 (100%) |         |
| Vitality                  |                      |                                |                      |                                              |                                             |                      |           |          |         |
| Appetite/weight loss      |                      |                                |                      |                                              |                                             |                      |           |          |         |
| Symptom burden            |                      |                                |                      |                                              |                                             |                      |           |          |         |
| Hearing problems          |                      |                                |                      |                                              |                                             |                      |           |          |         |
| Daily activities          | Functioning          | Physical functioning           | Physical functioning | 14 (100%)                                    | 8 (100%)                                    |                      |           |          |         |
| Problem solving           |                      |                                |                      |                                              |                                             |                      |           |          |         |
| Self-efficacy             |                      |                                |                      |                                              |                                             |                      |           |          |         |
| Mobility                  |                      |                                |                      |                                              |                                             |                      |           |          |         |
| Physical functioning      |                      |                                |                      |                                              |                                             |                      |           |          |         |
| Work                      |                      |                                |                      |                                              |                                             |                      |           |          |         |
| daily life independence   |                      |                                |                      |                                              |                                             |                      |           |          |         |
| General physical function |                      |                                |                      |                                              |                                             |                      |           |          |         |
| Healthy lifestyle         |                      |                                |                      |                                              |                                             |                      |           |          |         |
| Work                      |                      |                                |                      |                                              |                                             |                      |           |          |         |
| Daily activities          |                      | Mental functioning             | Mental functioning   | Anxiety                                      | 2 (21%)                                     | 2 (25%)              |           |          |         |
| Mobility                  |                      |                                |                      |                                              |                                             |                      |           |          |         |
| Mobility restrictions     |                      |                                |                      |                                              |                                             |                      |           |          |         |
| Cognition                 |                      |                                |                      |                                              |                                             |                      | Cognition | 2 (14%)  | 3 (38%) |
| Depression                |                      |                                |                      |                                              |                                             |                      |           |          |         |
| Anxiety                   |                      |                                |                      |                                              |                                             |                      |           |          |         |
| Anxiety & Depression      |                      |                                |                      |                                              |                                             |                      | Mental    | 10 (71%) | 7 (88%) |
| General mental health     |                      |                                |                      |                                              |                                             |                      |           |          |         |
| Depression                |                      |                                |                      |                                              |                                             |                      |           |          |         |
| Emotional health          |                      |                                |                      |                                              |                                             |                      |           |          |         |

|                           |                 |  |  |  |  |                    |                                  |          |         |                          |          |         |
|---------------------------|-----------------|--|--|--|--|--------------------|----------------------------------|----------|---------|--------------------------|----------|---------|
| Concentration/memory      |                 |  |  |  |  |                    |                                  |          |         |                          |          |         |
| Cognitive functioning     |                 |  |  |  |  |                    |                                  |          |         |                          |          |         |
| Mental Health             |                 |  |  |  |  |                    |                                  |          |         |                          |          |         |
| Anxiety                   |                 |  |  |  |  | Depression         | 3 (21%)                          | 1 (13%)  |         |                          |          |         |
| Mental health             |                 |  |  |  |  |                    |                                  |          |         |                          |          |         |
| Social roles              |                 |  |  |  |  | Social functioning | Social functioning/participation | 13 (93%) | 6 (75%) |                          |          |         |
| Social activities         |                 |  |  |  |  |                    |                                  |          |         |                          |          |         |
| Interpersonal functioning |                 |  |  |  |  |                    |                                  |          |         |                          |          |         |
| Participation             |                 |  |  |  |  |                    |                                  |          |         |                          |          |         |
| General Social Health     |                 |  |  |  |  |                    |                                  |          |         |                          |          |         |
| Social contacts           |                 |  |  |  |  |                    |                                  |          |         |                          |          |         |
| Sexuality                 | Remaining items |  |  |  |  |                    |                                  |          |         |                          |          |         |
| sexual functioning        |                 |  |  |  |  | Sexuality          | Sexuality                        | 4 (29%)  | 1 (13%) |                          |          |         |
| Intimate relations        |                 |  |  |  |  |                    |                                  |          |         |                          |          |         |
| Health experience         |                 |  |  |  |  | Overarching        |                                  |          |         |                          |          |         |
| General Physical Health   |                 |  |  |  |  |                    |                                  |          |         |                          |          |         |
| Overall Health Experience |                 |  |  |  |  |                    |                                  |          |         | Perceived Overall Health | 10 (71%) | 5 (63%) |
| General Health            |                 |  |  |  |  |                    |                                  |          |         |                          |          |         |
| Overall sense of health   |                 |  |  |  |  |                    |                                  |          |         |                          |          |         |
| Quality of life           |                 |  |  |  |  |                    |                                  |          |         | Quality of life          | 9 (64%)  | 7 (88%) |
| Meaning                   |                 |  |  |  |  |                    |                                  |          |         |                          |          |         |
| What is important in life |                 |  |  |  |  |                    |                                  |          |         |                          |          |         |
| Valued activities         |                 |  |  |  |  |                    |                                  |          |         |                          |          |         |
| Quality of life           |                 |  |  |  |  |                    |                                  |          |         |                          |          |         |

\*= N (%) of raters including the PRO in top 7 of most important outcomes

**Supplemental Table 3. Assessment of PROMs**

| PRO(s)                        | PROM(s)                                                                                        | Content validity | Feasibility |       |       | Measurement properties |          |                | PROMIS Metric |
|-------------------------------|------------------------------------------------------------------------------------------------|------------------|-------------|-------|-------|------------------------|----------|----------------|---------------|
|                               |                                                                                                |                  | Burden      | Items | Costs | Reliability            | Validity | Responsiveness |               |
| Quality of life               | Topics NRS Quality of life                                                                     | +                | ?           | +     | +     | ?                      | ?        | ?              | n.a.          |
|                               | V1.2 PROMIS Global02                                                                           | +                | ?           | +     | +     | ?                      | ?        | ?              | n.a.          |
| Perceived health              | PROMIS Global 01                                                                               | +                | ?           | +     | +     | ?                      | ?        | ?              | n.a.          |
|                               | SF-36 question 1                                                                               | +                | ?           | ?     | +     | ?                      | ?        | ?              | n.a.          |
|                               | TOPICS-SF NRS Overall health                                                                   | ?                | +           | +     | +     | ?                      | ?        | ?              | n.a.          |
| Participation in social roles | WHO Disability Assessment Scale (WHODAS) Participation                                         | -                | ?           | +     | +     | +                      | +        | ?              | ?             |
|                               | SF-36/RAND-36 Emotional role functioning                                                       | +                | -           | +     | +     | +                      | +        | +              | ?             |
|                               | SF-36/RAND-36 Physical role functioning                                                        | +                | ?           | +     | +     | +                      | +        | +              | ?             |
|                               | V2.0 PROMIS Ability to Participate in Social Roles and Activities SF4a                         | +                | ?           | +     | +     | +                      | ?        | ?              | +             |
|                               | V2.0 PROMIS Ability to Participate in Social Roles and Activities SF6a                         | +                | ?           | +     | +     | +                      | ?        | ?              | +             |
|                               | V2.0 PROMIS Ability to Participate in Social Roles and Activities SF8a                         | +                | ?           | +     | +     | +                      | ?        | +              | +             |
|                               | V2.0 PROMIS Ability to Participate in Social Roles and Activities CAT                          | +                | ?           | ?     | +     | +                      | ?        | +              | +             |
|                               | TOPICS-SF 4 point rating scale social activities                                               | -                | ?           | +     | +     | ?                      | ?        | ?              | ?             |
|                               | Utrecht Scale for Evaluation of Rehabilitation-Participation (USER-Participation restrictions) | +                | ?           | +     | +     | ?                      | ?        | ?              | ?             |
|                               | Positive Health Questionnaire Participation                                                    | -                | +           | ?     | +     | ?                      | ?        | ?              | ?             |

|                             |                                                                            |   |   |   |   |   |   |   |   |
|-----------------------------|----------------------------------------------------------------------------|---|---|---|---|---|---|---|---|
|                             | Functional Assessment of Chronic Illness Therapy - Participation (FACIT-P) | - | ? | + | + | ? | ? | ? | ? |
| <b>Physical functioning</b> | SF-36/RAND-36 Physical Functioning                                         | + | + | + | + | + | + | + | + |
|                             | TOPICS-SF Tasks and activities of daily life                               | ? | ? | + | + | ? | ? | ? | ? |
|                             | Positive Health Questionnaire Everyday activities                          | - | + | + | + | ? | ? | ? | ? |
|                             | V2.0 PROMIS Physical Function SF4a                                         | - | ? | + | + | + | + | ? | + |
|                             | V2.0 PROMIS Physical Function SF6b                                         | - | ? | + | + | + | + | ? | + |
|                             | V2.0 PROMIS Physical Function SF8b                                         | - | ? | + | + | + | + | ? | + |
|                             | V2.0 PROMIS Physical Function SF10a                                        | + | ? | + | + | + | + | + | + |
|                             | V2.0 PROMIS Physical Function SF10b                                        | + | ? | + | + | + | + | + | + |
|                             | V2.0 PROMIS Physical Function SF20a                                        | + | ? | + | ? | + | + | + | + |
|                             | V1.2 PROMIS Physical Function CAT                                          | + | ? | ? | + | + | + | + | + |
| <b>Anxiety</b>              | GAD-7                                                                      | + | ? | + | + | + | ? | ? | + |
|                             | 4DKL Anxiety                                                               | + | ? | ? | + | ? | ? | ? | ? |
|                             | HADS Anxiety                                                               | + | ? | ? | + | + | + | + | + |
|                             | MASQ                                                                       | - | ? | + | + | ? | ? | ? | + |
|                             | V1.0 PROMIS Anxiety short form 4a                                          | + | ? | + | + | ? | + | + | + |
|                             | V1.0 PROMIS Anxiety short form 6a                                          | + | ? | + | + | ? | + | + | + |
|                             | V1.0 PROMIS Anxiety short form 8a                                          | + | ? | + | + | + | + | + | + |
|                             | V1.0 PROMIS Anxiety short form                                             | + | ? | + | + | + | + | + | + |

|                   |                                                                      |   |   |   |   |   |   |   |   |
|-------------------|----------------------------------------------------------------------|---|---|---|---|---|---|---|---|
|                   | 7a                                                                   |   |   |   |   |   |   |   |   |
| <b>Depression</b> | V1.0 PROMIS Anxiety CAT                                              | + | ? | + | + | + | + | + | + |
|                   | PHQ-9                                                                | ? | ? | + | + | + | ? | ? | + |
|                   | PHQ-2                                                                | ? | ? | + | + | + | + | ? | + |
|                   | V1.0 PROMIS Depression short form 4a                                 | ? | ? | + | + | + | + | + | + |
|                   | V1.0 PROMIS Depression short form 6a                                 | ? | ? | + | + | + | + | + | + |
|                   | V1.0 PROMIS Depression short form 8a                                 | ? | ? | + | + | + | + | + | + |
|                   | V1.0 PROMIS Depression short form 8b                                 | ? | ? | + | + | + | + | + | + |
|                   | V1.0 PROMIS Depression CAT                                           | ? | ? | ? | + | + | + | + | + |
|                   | HADS Depression                                                      | - | ? | ? | + | + | + | + | + |
|                   | WHO-5 Wellbeing Index                                                | - | - | + | + | ? | ? | ? | ? |
|                   | Beck Depression Inventory-II (BDI-II)                                | ? | ? | ? | ? | + | ? | ? | + |
|                   | 4DKL Depression                                                      | + | ? | ? | ? | ? | ? | ? | ? |
|                   | Positive Health Questionnaire – Mental wellbeing                     | - | + | + | + | ? | ? | ? | ? |
|                   | CES-D                                                                | + | ? | ? | ? | ? | + | ? | + |
| <b>Fatigue</b>    | Numeric Rating Scale (NRS-11) fatigue                                | + | + | + | + | ? | ? | ? | + |
|                   | Functional Assessment of Chronic Illness Therapy - Fatigue (FACIT-F) | - | ? | ? | + | + | + | ? | + |
|                   | Fatigue Severity Scale (FSS)                                         | - | - | ? | + | ? | ? | ? | ? |
|                   | Modified Fatigue Impact Scale (MFIS)                                 | - | ? | ? | ? | ? | ? | ? | ? |
|                   | V1.0 PROMIS Fatigue short form 4a                                    | + | ? | + | + | + | + | + | + |
|                   | V1.0 PROMIS Fatigue short form 6a                                    | ? | ? | + | + | + | + | + | + |
|                   | V1.0 PROMIS Fatigue short form                                       | ? | ? | + | + | + | + | + | + |



|             |                                                       |   |   |   |   |   |   |   |      |
|-------------|-------------------------------------------------------|---|---|---|---|---|---|---|------|
|             | 8a                                                    |   |   |   |   |   |   |   |      |
|             | V1.0 PROMIS Fatigue CAT                               | ? | ? | ? | + | + | + | + | +    |
| <b>Pain</b> | NRS Pain Intensity                                    | + | + | + | + | ? | + | ? | n.a. |
|             | PROMIS® Numeric Rating Scale v1.0 – Pain Intensity 1a | + | + | + | + | ? | ? | ? | n.a. |
|             | SF-36/RAND-36 Bodily Pain                             | ? | - | + | + | + | + | + | n.a. |
|             | TOPICS-SF 4 point Rating scale pain                   | ? | ? | + | + | ? | ? | ? | n.a. |

'+' = 'Green rating'; see Supplemental Table 1. PROMs signaling questions , "-" = 'Red rating'; see Supplemental Table 1. PROMs signaling questions – '?' = 'Amber rating'; see Supplemental Table 1. PROMs signaling questions
